# Supplementary material
Source: PubMed Central journal article supplement (PMC5477467)

# Modulation of Phosphopeptide Fragmentation via Dual Spray Ion/Ion Reactions using a Sulfonate-Incorporating Reagent

Victoria C. Cotham, William M. McGee and Jennifer S. Brodbelt\*

Department of Chemistry  
The University of Texas at Austin  
Austin, TX, USA 78712

Correspondence to: Jennifer Brodbelt, [jbrodbelt@cm.utexas.edu](mailto:jbrodbelt@cm.utexas.edu)

**Supporting Information:** Supplement figures include a CID product ion spectrum of unmodified KKALRRQEpTVDAL 2+, representative ESI-MS spectra before and after ion/ion reactions with FBDSA, an MS2 spectrum demonstrating covalent conversion of a phosphopeptide to its FBDSA-modified analogue, MS3 CID product ion spectrum for a Schiff base modified peptide, reaction schemes for N-terminal modification of peptides via carbamylation and SPITC derivatization, ESI-MS spectra for a carbamylated and SPITC modified phosphopeptide, and a CID product ion spectrum for a SPITC modified phosphopeptide.

**Figure S1.** Summary of phosphopeptide cation derivatization with FBDSA anions via front-end ion/ion-mediated bioconjugation.

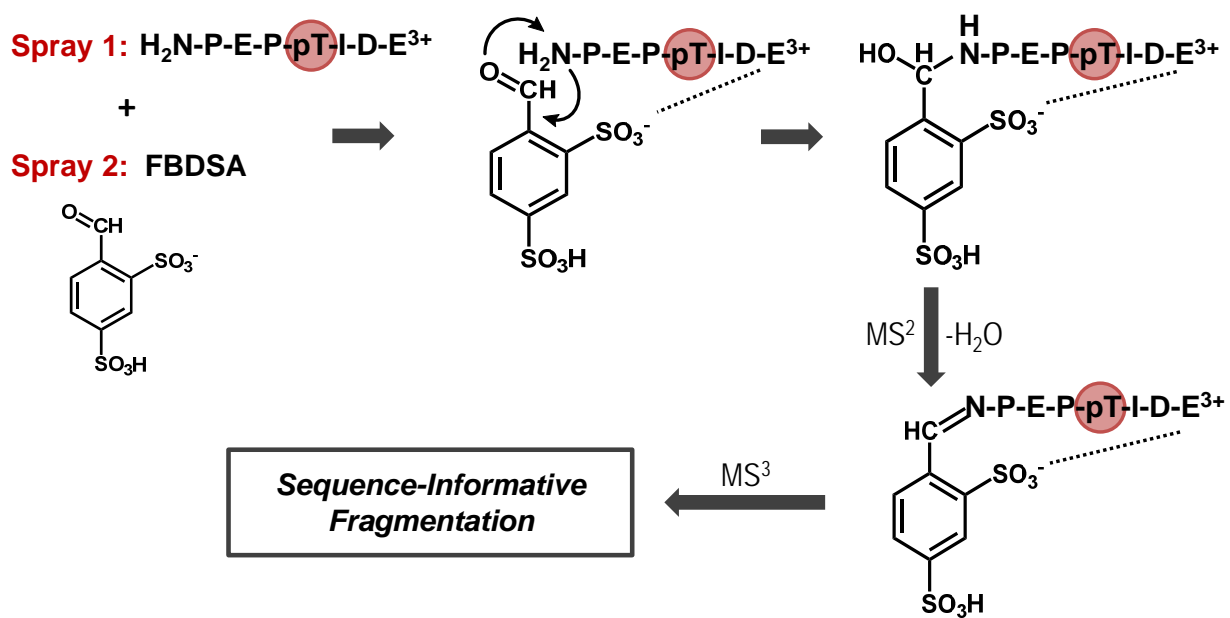

**Figure S2.** CID product ion spectrum of the 2+ charge state of KKALRRQEpTVDAL. Neutral loss of phosphate is indicated by “-P” in the product ion label.

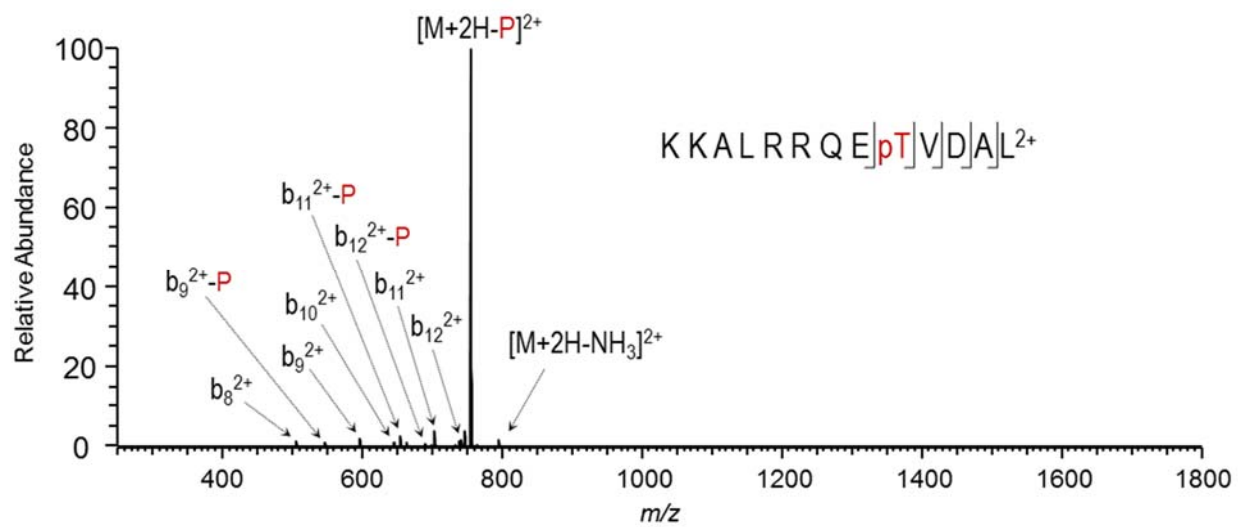

**Figure S3.** Process for online modification of phosphopeptides with FBDSA using a dual spray reactor. ESI spectra for (a) unreacted and (b) dual source reacted KKALRRQE<sub>p</sub>TVDAL. Charge-reduced electrostatic complexes are formed at atmospheric pressure between multiply charged phosphopeptide cations and FBDSA reagent anions (denoted by the “ $\Delta$ ” subscript), and transferred and mass analyzed in the linear ion trap. (c) Low-energy collisional activation of these ion/ion intermediates promotes concomitant imine bond formation and dehydration to form a covalent Schiff base product ( $\blacklozenge$ ). (d) CID of the resulting Schiff base phosphopeptide results in sequence-informative fragmentation.

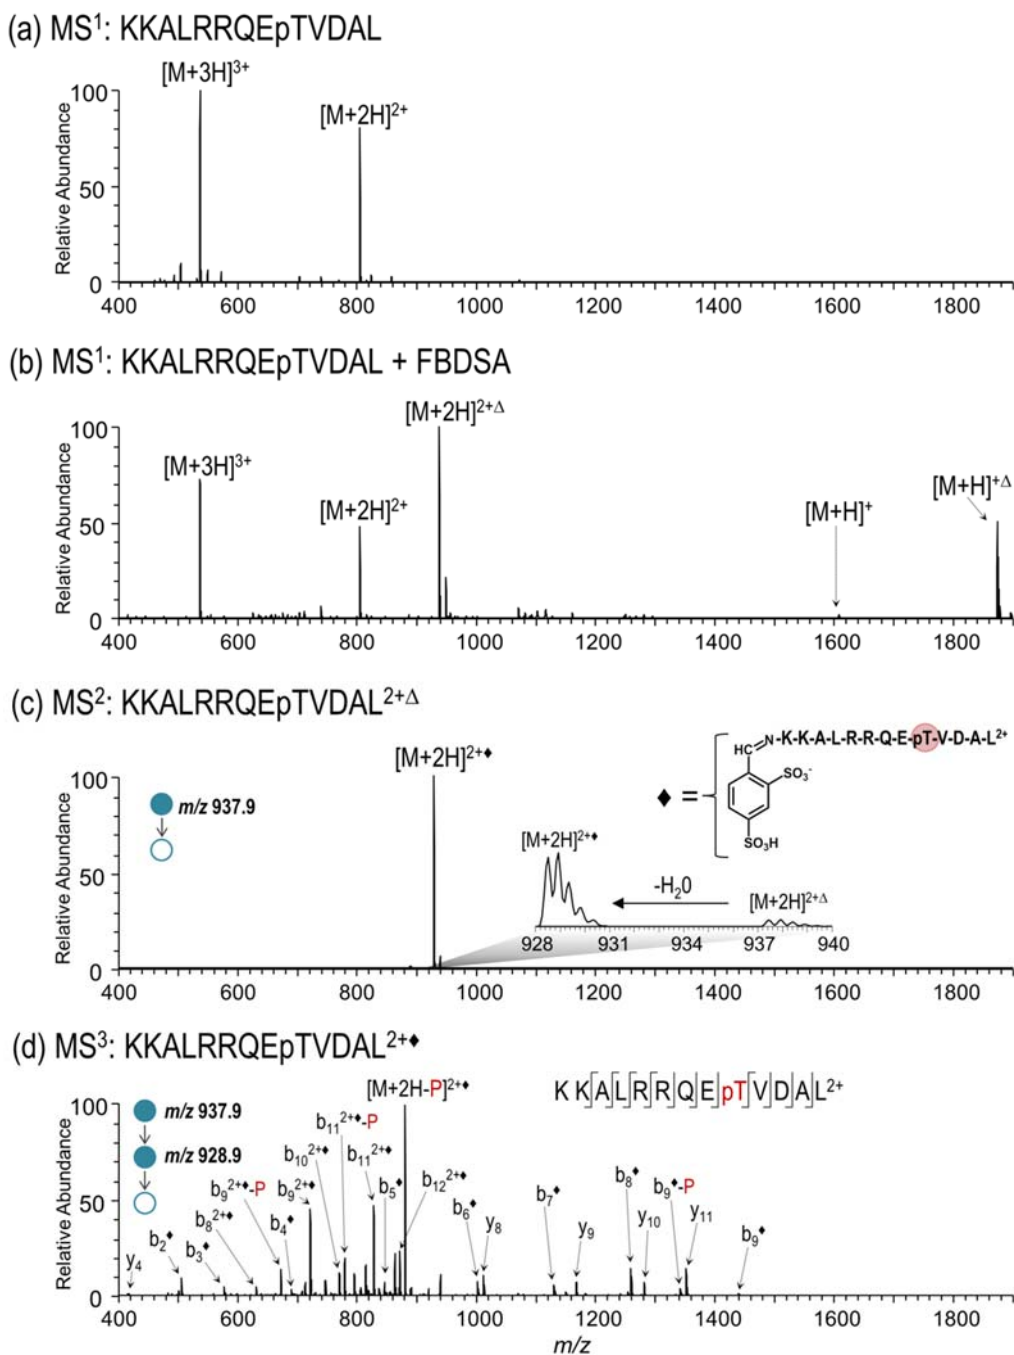

**Figure S4.** (a) Dual source mass spectrum of tryptic peptide LIEDAEpYAAR. Electrostatic FBDSA/phosphopeptide complex formation is denoted by the “ $\Delta$ ” subscript. Comparative CID product ion mass spectra of LIEDAEpYAAR (1+) before and after Schiff base modification are shown in (b) and (c), where: (b) MS<sup>2</sup> CID mass spectrum of unlabeled peptide and (c) MS<sup>3</sup> CID mass spectrum following online dual spray reactor-initiated derivatization. The addition of “ $\blacklozenge$ ” to the label indicates covalent FBDSA Schiff base modification, “-P” denotes loss of phosphate, and “ $\circ$ ” indicates neutral loss of water or ammonia.

**(a) MS<sup>1</sup>: LIEDAEpYAAR + FBDSA**

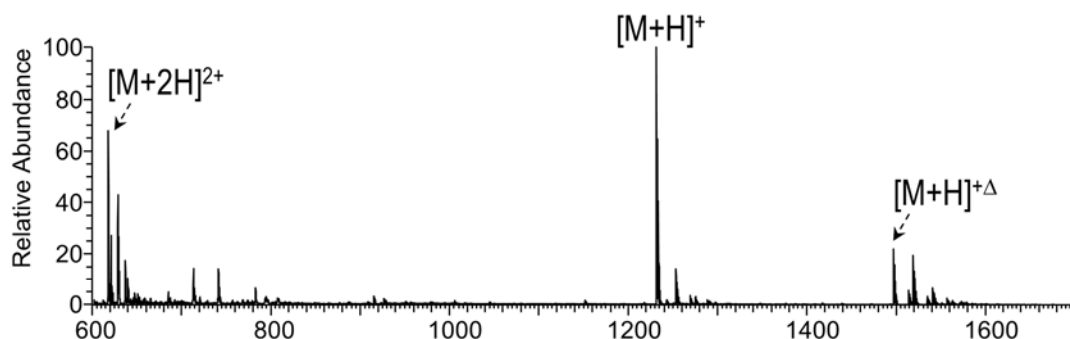

**(b) Unmodified: L I [E] [D] [A] [E] [p] Y A A R<sup>+</sup>**

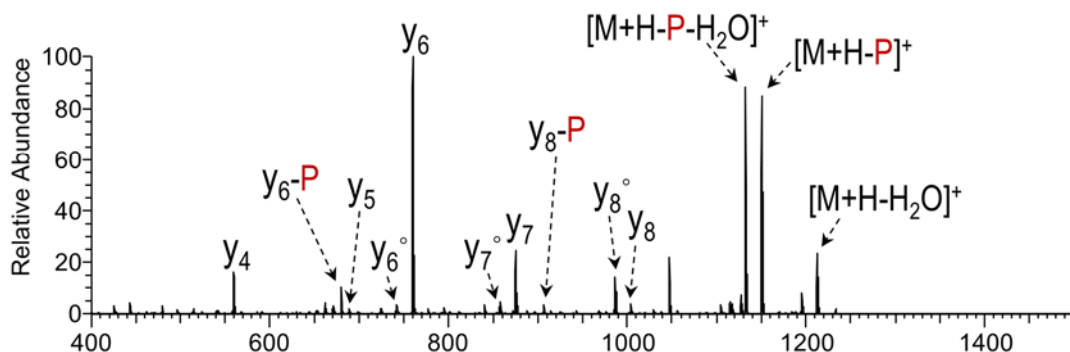

**(c) Schiff Base: L I [E] [D] [A] [E] [p] Y A A R<sup>+</sup>**

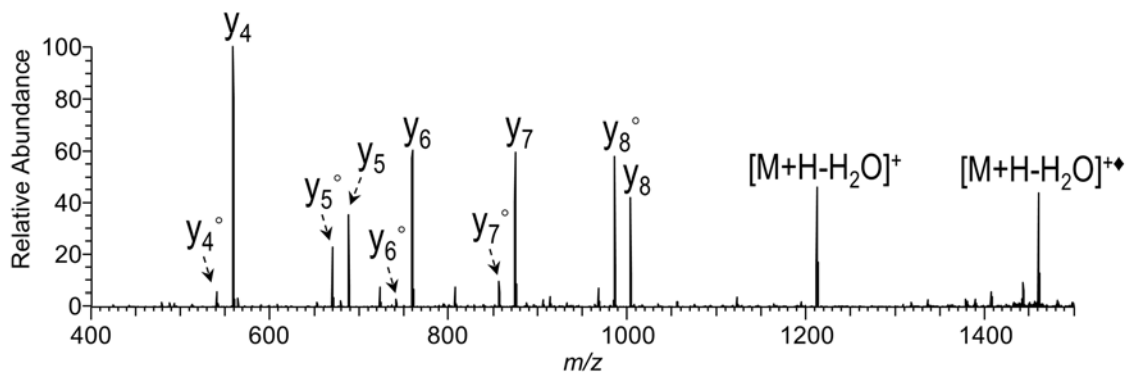

**Figure S5.** (a) Dual source mass spectrum of peptide LHpSPQSLPR. Electrostatic FBDSA/phosphopeptide complex formation is denoted by the “ $\Delta$ ” subscript. Comparative CID product ion mass spectra of LHpSPQSLPR (1+) before and after Schiff base modification are shown in (b) and (c), where: (b) MS<sup>2</sup> CID mass spectrum of unlabeled peptide and (c) MS<sup>3</sup> CID mass spectrum following online dual spray reactor-initiated derivatization. The addition of “ $\blacklozenge$ ” to the label indicates covalent FBDSA Schiff base modification, “-P” denotes loss of phosphate, and “ $\circ$ ” indicates neutral loss of water or ammonia.

**(a) MS<sup>1</sup>: LHpSPQSLPR + FBDSA**

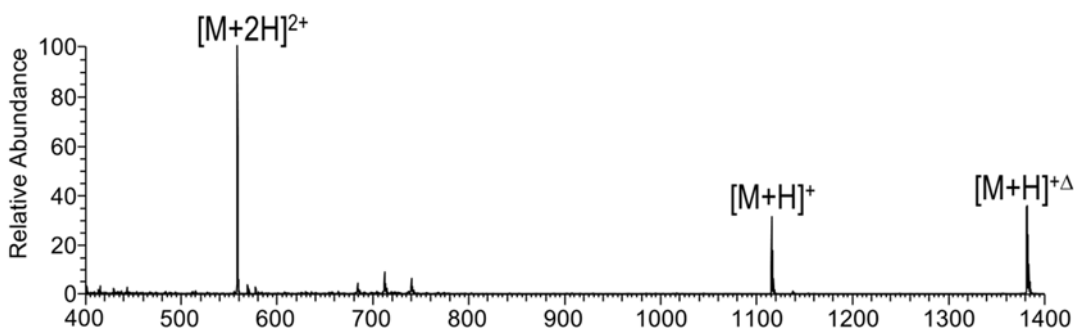

**(b) Unmodified: L H [p S [P Q [S [L P R +**

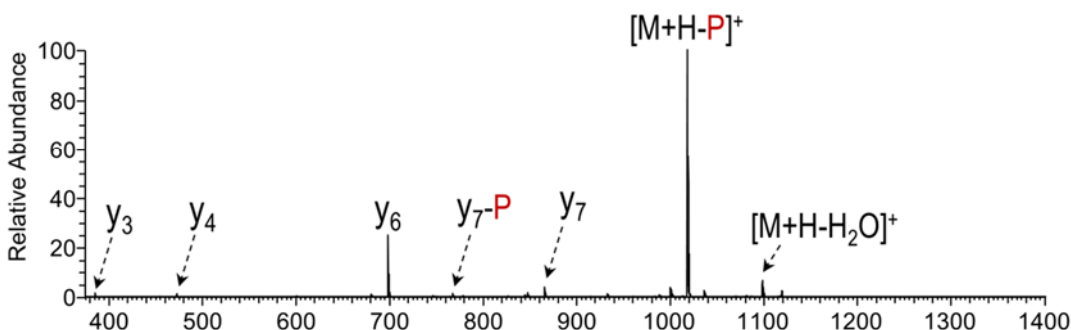

**(c) Schiff Base: L [H [p S [P [Q [S [L P R +**

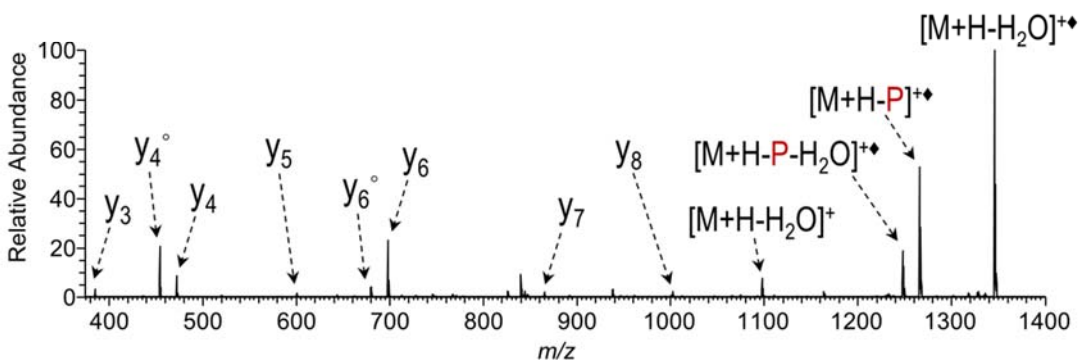

**Figure S6.** Reaction scheme for N-terminal (a) carbamylation, and (b) 4-sulfophenyl isothiocyanate (SPITC) derivatization of a peptide.

(a) Carbamylation

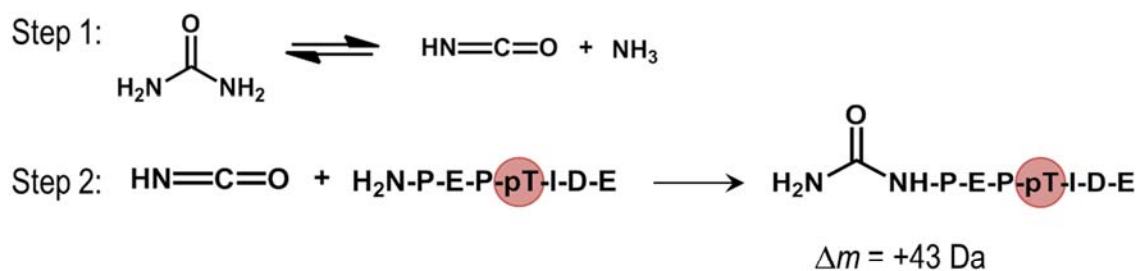

(b) SPITC Derivatization

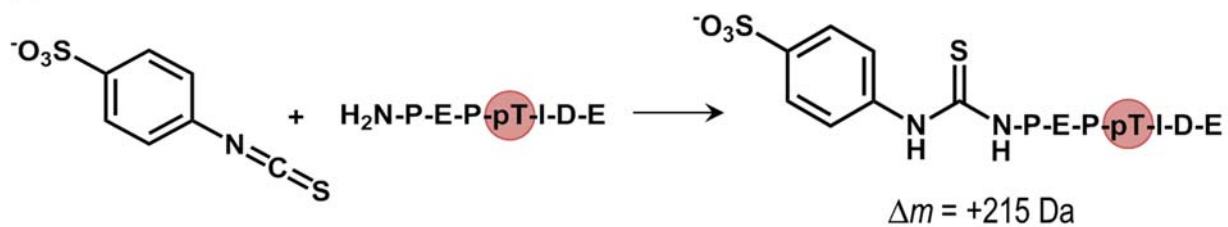

**Figure S7.** Mass spectra of RQpSVELHSPQSLPR prior to (a) and after (b) carbamylation, (c) SPITC derivatization, and (d) ion/ion reaction with FBDSA.

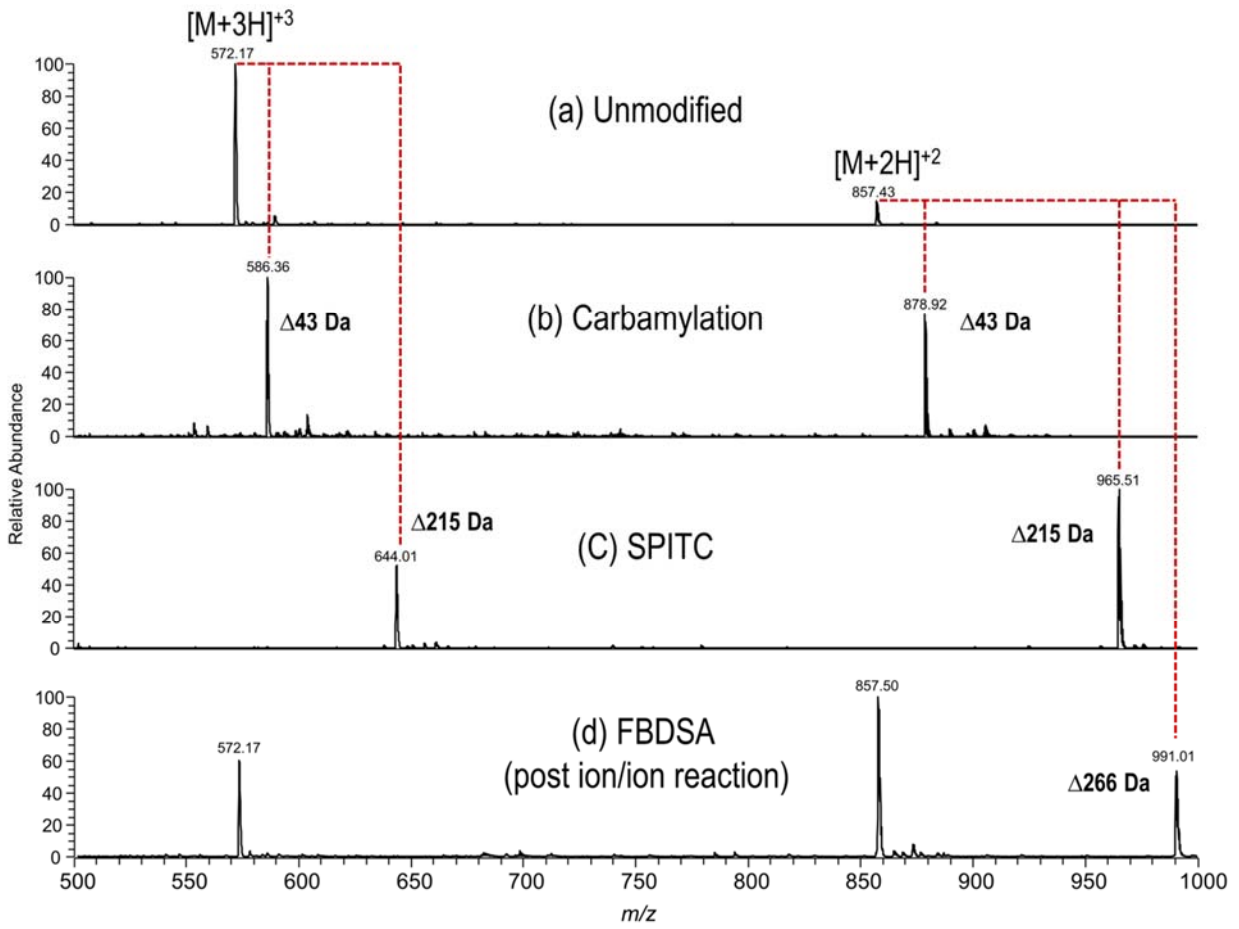



**Figure S8.** CID product ion spectrum of SPITC modified RQpSVELHSPQSLPR 2+. The abundant product ion a  $m/z$  878 corresponds to sulfanilic acid cleavage from the SPITC tag. A modified  $b_1$  ion results from the Edmund degradation process shown in the inset.

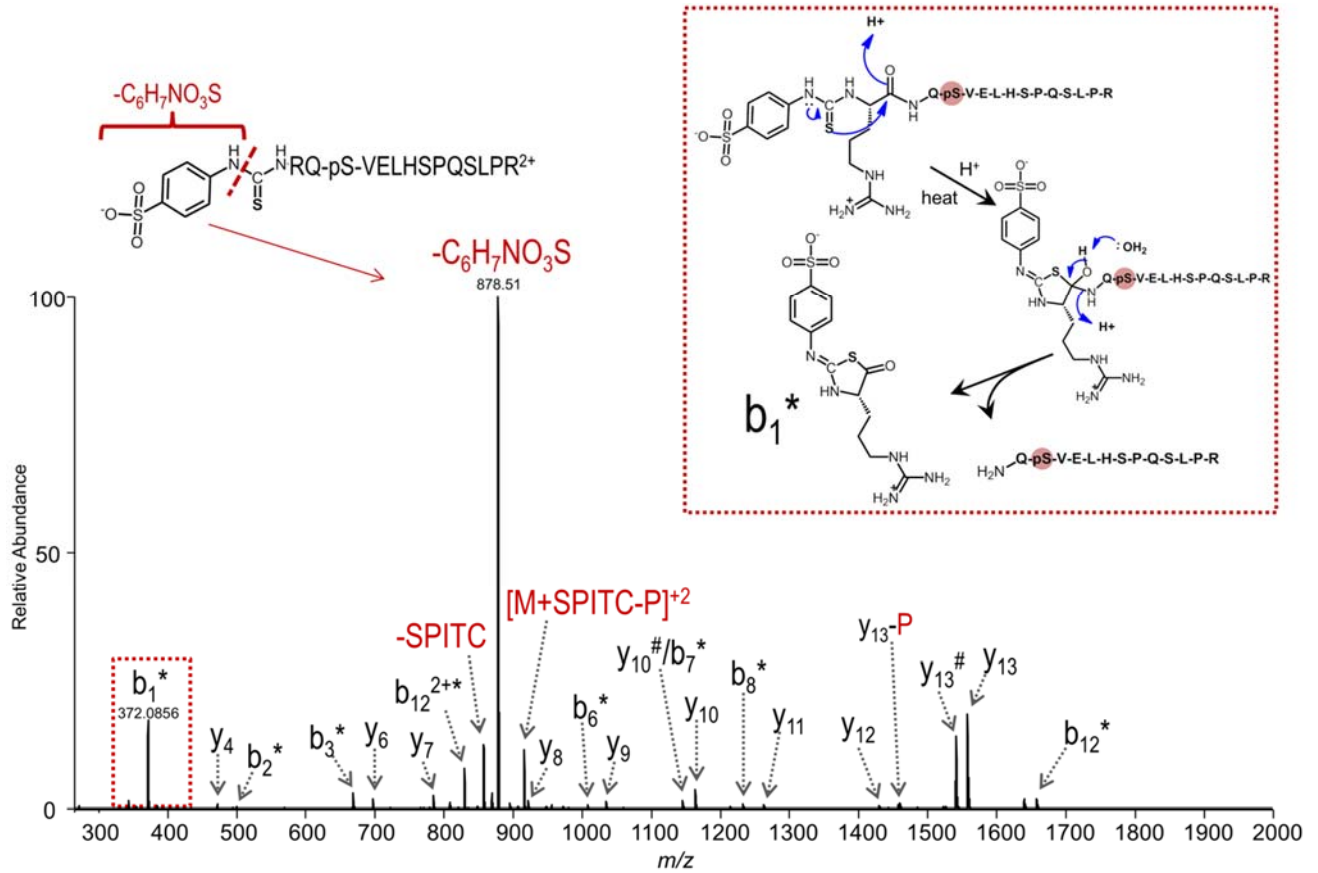

Supplement: NIHMS867857-supplement-Supplemental.pdf [file NIHMS867857-supplement-Supplemental.pdf]
